# Supplementary material for: The essential role of symmetry in understanding 3He chemical shifts in endohedral helium fullerenes
Source: Royal Society of Chemistry journal article supplement (doi:10.1039/d3cp00256j), 2023-01-01
Supplement: d3cp00256j1.pdf [file d3cp00256j1.pdf]

## The Essential Role of Symmetry in Understanding $^3\text{He}$ Chemical Shifts in Endohedral Helium Fullerenes

### Supporting Information

Jan Vicha,<sup>†,‡,\*</sup> Juha Vaara<sup>1,\*</sup> and Michal Straka,<sup>‡</sup>

<sup>†</sup>Centre of Polymer Systems, University Institute, Tomas Bata University in Zlín, Trída T. Bati, 5678, CZ-76001 Zlín, Czech Republic

<sup>1</sup>NMR Research Unit, P.O. Box 3000, FI-90014 University of Oulu, Finland

<sup>‡</sup>Institute of Organic Chemistry and Biochemistry, Academy of Sciences of the Czech Republic, Flemingovo nám. 2, 16610 Prague, Czech Republic

**Table S1:** Energies of selected frontier orbitals (eV).

| Molecule                          | Orbital          | Energy (eV) | Molecule                         | Orbital             | Energy (eV) |
|-----------------------------------|------------------|-------------|----------------------------------|---------------------|-------------|
| He@C <sub>60</sub>                | 7t <sub>1u</sub> | -9.054      | He@C <sub>70</sub>               | 19e <sub>1</sub> '' | -7.416      |
|                                   | 6h <sub>u</sub>  | -7.525      |                                  | 14a <sub>2</sub> '' | -7.361      |
|                                   | 10h <sub>g</sub> | -3.268      |                                  | 20e <sub>1</sub> '' | -3.346      |
| He@C <sub>60</sub> <sup>6-</sup>  | 7t <sub>1u</sub> | 10.345      | 6a <sub>1</sub> ''               | -2.7                |             |
|                                   | 6h <sub>u</sub>  | 12.803      | 18a <sub>1</sub> '               | -2.273              |             |
|                                   | 10h <sub>g</sub> | 15.33       | He@C <sub>70</sub> <sup>6-</sup> | 19e <sub>1</sub> '' | 9.175       |
| He@C <sub>60</sub> <sup>10+</sup> | 7t <sub>1u</sub> | -39.737     |                                  | 14a <sub>2</sub> '' | 9.314       |
|                                   | 6h <sub>u</sub>  | -36.969     |                                  | 6a <sub>1</sub> ''  | 11.533      |
|                                   | 10h <sub>g</sub> | -34.539     | 20e <sub>1</sub> ''              | 13.898              |             |
|                                   |                  |             | 18a <sub>1</sub> '               | 15.474              |             |

**Table S2:** The diamagnetic and paramagnetic contributions to the  $^3\text{He}$  nuclear shielding constant ( $\sigma$ ) and calculated, as well as experimental  $\delta(^3\text{He})$  in  $\text{He}@C_n$  ( $n = 60, 76, 78, 84$ ) series of endohedral He fullerenes.

| <i>Molecule</i>                            | $\sigma_{\text{He}}^{d+s1}$ | $\sigma_K^d$ | $\sigma_K^p$ | $\delta(^3\text{He})_{\text{calc}}$ | $\delta(^3\text{He})_{\text{exp}}$ |
|--------------------------------------------|-----------------------------|--------------|--------------|-------------------------------------|------------------------------------|
| $\text{He}@C_{60}^{12-}$                   | 37.1                        | <b>300.9</b> | -263.8       | <b>22.9</b>                         | -                                  |
| $^3\text{He}@D_2(1)\text{-}C_{76}$         | 79.9                        | <b>297.1</b> | -217.2       | <b>-19.9</b>                        | -18.8                              |
| $^3\text{He}@D_2(1)\text{-}C_{76}^{6-}$    | 83.7                        | <b>312.0</b> | -228.3       | <b>-23.7</b>                        | -20.6                              |
| $^3\text{He}@C_{2v}(3)\text{-}C_{78}$      | 78.6                        | <b>301.9</b> | -223.2       | <b>-18.7</b>                        | -17.6                              |
| $^3\text{He}@C_{2v}(3)\text{-}C_{78}^{6-}$ | 79.2                        | <b>316.2</b> | -237.0       | <b>-19.2</b>                        | -13.5*                             |
| $^3\text{He}@C_{2v}(2)\text{-}C_{78}$      | 78.0                        | <b>300.2</b> | -222.2       | <b>-18.0</b>                        | -16.9                              |
| $^3\text{He}@C_{2v}(2)\text{-}C_{78}^{4-}$ | 72.9                        | <b>310.9</b> | -237.9       | <b>-13.0</b>                        | -10.0                              |
| $^3\text{He}@D_2(22)C_{84}$                | 69.1                        | <b>307.9</b> | -238.7       | <b>-9.2</b>                         | -7.5                               |
| $^3\text{He}@D_2(22)C_{84}^{6-}$           | 86.9                        | <b>322.4</b> | -235.5       | <b>-26.9</b>                        | -24.4                              |
| $^3\text{He}@D_{2d}(4)C_{84}$              | 86.3                        | <b>308.4</b> | -222.1       | <b>-26.3</b>                        | -22.8                              |
| $^3\text{He}@D_{2d}(4)C_{84}^{6-}$         | 80.7                        | <b>322.4</b> | -241.8       | <b>-20.7</b>                        | -22.1                              |

\*Probably a  $^3\text{He}@C_{2v}(3)\text{-}C_{78}^{4-}$  (tetra-anion)

### Geometry coordinates:

$^3\text{He}@I_h\text{-}C_{60}$

61

```

He  0.000000  0.000000  0.000000
C   -1.237374  0.000000  3.332981
C   -0.382370 -1.176812  3.332981
C    1.001056 -0.727310  3.332981
C    1.001056  0.727310  3.332981
C   -0.382370  1.176812  3.332981
C    2.346451 -2.603801  0.595182
C    3.201455 -1.426989  0.595182
C    2.965138 -0.699679  1.832556
C    1.964082 -1.426989  2.597295
C    1.581712 -2.603801  1.832556
C    3.201455  1.426989  0.595182
C    2.346451  2.603801  0.595182
C    1.581712  2.603801  1.832556

```

C 1.964082 1.426989 2.597295  
C 2.965138 0.699679 1.832556  
C -0.367843 3.485729 0.595182  
C -1.751269 3.036226 0.595182  
C -1.987586 2.308916 1.832556  
C -0.750212 2.308916 2.597295  
C 0.250844 3.036226 1.832556  
C -3.428795 0.727310 0.595182  
C -3.428795 -0.727310 0.595182  
C -2.810108 -1.176812 1.832556  
C -2.427738 0.000000 2.597295  
C -2.810108 1.176812 1.832556  
C -1.751269 -3.036226 0.595182  
C -0.367843 -3.485729 0.595182  
C 0.250844 -3.036226 1.832556  
C -0.750212 -2.308916 2.597295  
C -1.987586 -2.308916 1.832556  
C -0.250844 -3.036226 -1.832556  
C 0.750212 -2.308916 -2.597295  
C 1.987586 -2.308916 -1.832556  
C 1.751269 -3.036226 -0.595182  
C 0.367843 -3.485729 -0.595182  
C 2.810108 -1.176812 -1.832556  
C 2.427738 0.000000 -2.597295  
C 2.810108 1.176812 -1.832556  
C 3.428795 0.727310 -0.595182  
C 3.428795 -0.727310 -0.595182  
C 1.987586 2.308916 -1.832556  
C 0.750212 2.308916 -2.597295  
C -0.250844 3.036226 -1.832556  
C 0.367843 3.485729 -0.595182  
C 1.751269 3.036226 -0.595182  
C -1.581712 2.603801 -1.832556  
C -1.964082 1.426989 -2.597295  
C -2.965138 0.699679 -1.832556  
C -3.201455 1.426989 -0.595182  
C -2.346451 2.603801 -0.595182  
C -2.965138 -0.699679 -1.832556  
C -1.964082 -1.426989 -2.597295  
C -1.581712 -2.603801 -1.832556  
C -2.346451 -2.603801 -0.595182  
C -3.201455 -1.426989 -0.595182  
C -1.001056 -0.727310 -3.332981  
C -1.001056 0.727310 -3.332981  
C 0.382370 1.176812 -3.332981  
C 1.237374 0.000000 -3.332981  
C 0.382370 -1.176812 -3.332981

|   |           |           |           |
|---|-----------|-----------|-----------|
| C | -1.237816 | 0.000000  | 3.368034  |
| C | -0.382506 | -1.177233 | 3.368034  |
| C | 1.001414  | -0.727570 | 3.368034  |
| C | 1.001414  | 0.727570  | 3.368034  |
| C | -0.382506 | 1.177233  | 3.368034  |
| C | 2.371793  | -2.622534 | 0.610539  |
| C | 3.227102  | -1.445301 | 0.610539  |
| C | 2.990700  | -0.717731 | 1.848354  |
| C | 1.989286  | -1.445301 | 2.613367  |
| C | 1.606780  | -2.622534 | 1.848354  |
| C | 3.227102  | 1.445301  | 0.610539  |
| C | 2.371793  | 2.622534  | 0.610539  |
| C | 1.606780  | 2.622534  | 1.848354  |
| C | 1.989286  | 1.445301  | 2.613367  |
| C | 2.990700  | 0.717731  | 1.848354  |
| C | -0.377334 | 3.515779  | 0.610539  |
| C | -1.761254 | 3.066116  | 0.610539  |
| C | -1.997655 | 2.338546  | 1.848354  |
| C | -0.759840 | 2.338546  | 2.613367  |
| C | 0.241574  | 3.066116  | 1.848354  |
| C | -3.460307 | 0.727570  | 0.610539  |
| C | -3.460307 | -0.727570 | 0.610539  |
| C | -2.841399 | -1.177233 | 1.848354  |
| C | -2.458893 | 0.000000  | 2.613367  |
| C | -2.841399 | 1.177233  | 1.848354  |
| C | -1.761254 | -3.066116 | 0.610539  |
| C | -0.377334 | -3.515779 | 0.610539  |
| C | 0.241574  | -3.066116 | 1.848354  |
| C | -0.759840 | -2.338546 | 2.613367  |
| C | -1.997655 | -2.338546 | 1.848354  |
| C | -0.241574 | -3.066116 | -1.848354 |
| C | 0.759840  | -2.338546 | -2.613367 |
| C | 1.997655  | -2.338546 | -1.848354 |
| C | 1.761254  | -3.066116 | -0.610539 |
| C | 0.377334  | -3.515779 | -0.610539 |
| C | 2.841399  | -1.177233 | -1.848354 |
| C | 2.458893  | 0.000000  | -2.613367 |
| C | 2.841399  | 1.177233  | -1.848354 |
| C | 3.460307  | 0.727570  | -0.610539 |
| C | 3.460307  | -0.727570 | -0.610539 |
| C | 1.997655  | 2.338546  | -1.848354 |
| C | 0.759840  | 2.338546  | -2.613367 |
| C | -0.241574 | 3.066116  | -1.848354 |
| C | 0.377334  | 3.515779  | -0.610539 |
| C | 1.761254  | 3.066116  | -0.610539 |
| C | -1.606780 | 2.622534  | -1.848354 |
| C | -1.989286 | 1.445301  | -2.613367 |

|    |           |           |           |
|----|-----------|-----------|-----------|
| C  | -2.990700 | 0.717731  | -1.848354 |
| C  | -3.227102 | 1.445301  | -0.610539 |
| C  | -2.371793 | 2.622534  | -0.610539 |
| C  | -2.990700 | -0.717731 | -1.848354 |
| C  | -1.989286 | -1.445301 | -2.613367 |
| C  | -1.606780 | -2.622534 | -1.848354 |
| C  | -2.371793 | -2.622534 | -0.610539 |
| C  | -3.227102 | -1.445301 | -0.610539 |
| C  | -1.001414 | -0.727570 | -3.368034 |
| C  | -1.001414 | 0.727570  | -3.368034 |
| C  | 0.382506  | 1.177233  | -3.368034 |
| C  | 1.237816  | 0.000000  | -3.368034 |
| C  | 0.382506  | -1.177233 | -3.368034 |
| He | 0.000000  | 0.000000  | 0.000000  |

${}^3\text{He}@I_h\text{-C}_{60}^{10+}$

61

|    |           |           |          |
|----|-----------|-----------|----------|
| He | 0.000000  | 0.000000  | 0.000000 |
| C  | -1.244558 | 0.000000  | 3.376236 |
| C  | -0.384590 | -1.183645 | 3.376236 |
| C  | 1.006869  | -0.731533 | 3.376236 |
| C  | 1.006869  | 0.731533  | 3.376236 |
| C  | -0.384590 | 1.183645  | 3.376236 |
| C  | 2.377372  | -2.631486 | 0.609328 |
| C  | 3.237341  | -1.447841 | 0.609328 |
| C  | 2.999651  | -0.716308 | 1.853886 |
| C  | 1.992782  | -1.447841 | 2.623066 |
| C  | 1.608193  | -2.631486 | 1.853886 |
| C  | 3.237341  | 1.447841  | 0.609328 |
| C  | 2.377372  | 2.631486  | 0.609328 |
| C  | 1.608193  | 2.631486  | 1.853886 |
| C  | 1.992782  | 1.447841  | 2.623066 |
| C  | 2.999651  | 0.716308  | 1.853886 |
| C  | -0.376585 | 3.526301  | 0.609328 |
| C  | -1.768044 | 3.074189  | 0.609328 |
| C  | -2.005733 | 2.342656  | 1.853886 |
| C  | -0.761175 | 2.342656  | 2.623066 |
| C  | 0.245694  | 3.074189  | 1.853886 |
| C  | -3.470083 | 0.731533  | 0.609328 |
| C  | -3.470083 | -0.731533 | 0.609328 |
| C  | -2.847804 | -1.183645 | 1.853886 |
| C  | -2.463214 | 0.000000  | 2.623066 |
| C  | -2.847804 | 1.183645  | 1.853886 |
| C  | -1.768044 | -3.074189 | 0.609328 |
| C  | -0.376585 | -3.526301 | 0.609328 |
| C  | 0.245694  | -3.074189 | 1.853886 |
| C  | -0.761175 | -2.342656 | 2.623066 |
| C  | -2.005733 | -2.342656 | 1.853886 |

C -0.245694 -3.074189 -1.853886  
C 0.761175 -2.342656 -2.623066  
C 2.005733 -2.342656 -1.853886  
C 1.768044 -3.074189 -0.609328  
C 0.376585 -3.526301 -0.609328  
C 2.847804 -1.183645 -1.853886  
C 2.463214 0.000000 -2.623066  
C 2.847804 1.183645 -1.853886  
C 3.470083 0.731533 -0.609328  
C 3.470083 -0.731533 -0.609328  
C 2.005733 2.342656 -1.853886  
C 0.761175 2.342656 -2.623066  
C -0.245694 3.074189 -1.853886  
C 0.376585 3.526301 -0.609328  
C 1.768044 3.074189 -0.609328  
C -1.608193 2.631486 -1.853886  
C -1.992782 1.447841 -2.623066  
C -2.999651 0.716308 -1.853886  
C -3.237341 1.447841 -0.609328  
C -2.377372 2.631486 -0.609328  
C -2.999651 -0.716308 -1.853886  
C -1.992782 -1.447841 -2.623066  
C -1.608193 -2.631486 -1.853886  
C -2.377372 -2.631486 -0.609328  
C -3.237341 -1.447841 -0.609328  
C -1.006869 -0.731533 -3.376236  
C -1.006869 0.731533 -3.376236  
C 0.384590 1.183645 -3.376236  
C 1.244558 0.000000 -3.376236  
C 0.384590 -1.183645 -3.376236

$^3\text{He}@D_{5h}(1)\text{-C}_{70}$

71

C 0.747852 -2.301651 -3.222106  
C 1.970779 -2.293643 -2.443798  
C 0.381954 -1.175534 -3.970039  
C 2.790388 -1.165547 -2.443798  
C 3.400451 -0.720101 -1.208698  
C 3.258042 -1.458042 0.000000  
C 3.400451 -0.720101 1.208698  
C -1.957902 -1.422499 -3.222106  
C -1.572380 -2.583097 -2.443798  
C -0.999969 -0.726520 -3.970039  
C -0.246224 -3.013991 -2.443798  
C 0.365941 -3.456544 -1.208698  
C -0.379890 -3.549142 0.000000  
C 0.365941 -3.456544 1.208698

C 2.393470 -2.648022 0.000000  
C 1.735654 -3.011497 -1.208698  
C 1.735654 -3.011497 1.208698  
C -1.957902 1.422499 -3.222106  
C -2.942563 0.697201 -2.443798  
C -0.999969 0.726520 -3.970039  
C -2.942563 -0.697201 -2.443798  
C -3.174287 -1.416161 -1.208698  
C -3.492827 -0.735448 0.000000  
C -3.174287 -1.416161 1.208698  
C -1.778796 -3.094609 0.000000  
C -2.327758 -2.581309 -1.208698  
C -2.327758 -2.581309 1.208698  
C 0.747852 2.301651 -3.222106  
C -0.246224 3.013991 -2.443798  
C 0.381954 1.175534 -3.970039  
C -1.572380 2.583097 -2.443798  
C -2.327758 2.581309 -1.208698  
C -1.778796 3.094609 0.000000  
C -2.327758 2.581309 1.208698  
C -3.492827 0.735448 0.000000  
C -3.174287 1.416161 -1.208698  
C -3.174287 1.416161 1.208698  
C 2.420099 0.000000 -3.222106  
C 2.790388 1.165547 -2.443798  
C 1.236029 0.000000 -3.970039  
C 1.970779 2.293643 -2.443798  
C 1.735654 3.011497 -1.208698  
C 2.393470 2.648022 0.000000  
C 1.735654 3.011497 1.208698  
C -0.379890 3.549142 0.000000  
C 0.365941 3.456544 -1.208698  
C 0.365941 3.456544 1.208698  
C 3.258042 1.458042 0.000000  
C 3.400451 0.720101 -1.208698  
C 3.400451 0.720101 1.208698  
C 0.747852 2.301651 3.222106  
C 1.970779 2.293643 2.443798  
C 2.790388 1.165547 2.443798  
C 0.381954 1.175534 3.970039  
C -1.957902 1.422499 3.222106  
C -1.572380 2.583097 2.443798  
C -0.246224 3.013991 2.443798  
C -0.999969 0.726520 3.970039  
C -1.957902 -1.422499 3.222106  
C -2.942563 -0.697201 2.443798  
C -2.942563 0.697201 2.443798  
C -0.999969 -0.726520 3.970039  
C 0.747852 -2.301651 3.222106  
C -0.246224 -3.013991 2.443798  
C -1.572380 -2.583097 2.443798

|    |          |           |          |
|----|----------|-----------|----------|
| C  | 0.381954 | -1.175534 | 3.970039 |
| C  | 2.420099 | 0.000000  | 3.222106 |
| C  | 2.790388 | -1.165547 | 2.443798 |
| C  | 1.970779 | -2.293643 | 2.443798 |
| C  | 1.236029 | 0.000000  | 3.970039 |
| He | 0.000000 | 0.000000  | 0.000000 |

${}^3\text{He}@D_{5h}(1)\text{-C}_{70}^{6-}$

71

|   |           |           |           |
|---|-----------|-----------|-----------|
| C | 0.755011  | -2.323684 | -3.221095 |
| C | 1.982981  | -2.323863 | -2.451559 |
| C | 0.382384  | -1.176856 | -4.002264 |
| C | 2.822900  | -1.167814 | -2.451559 |
| C | 3.447346  | -0.737813 | -1.224969 |
| C | 3.276982  | -1.463242 | 0.000000  |
| C | 3.447346  | -0.737813 | 1.224969  |
| C | -1.976644 | -1.436116 | -3.221095 |
| C | -1.597350 | -2.604040 | -2.451559 |
| C | -1.001093 | -0.727337 | -4.002264 |
| C | -0.238333 | -3.045612 | -2.451559 |
| C | 0.363586  | -3.506617 | -1.224969 |
| C | -0.378983 | -3.568762 | 0.000000  |
| C | 0.363586  | -3.506617 | 1.224969  |
| C | 2.404269  | -2.664428 | 0.000000  |
| C | 1.766991  | -3.050624 | -1.224969 |
| C | 1.766991  | -3.050624 | 1.224969  |
| C | -1.976644 | 1.436116  | -3.221095 |
| C | -2.970198 | 0.714477  | -2.451559 |
| C | -1.001093 | 0.727337  | -4.002264 |
| C | -2.970198 | -0.714477 | -2.451559 |
| C | -3.222637 | -1.429395 | -1.224969 |
| C | -3.511206 | -0.742374 | 0.000000  |
| C | -3.222637 | -1.429395 | 1.224969  |
| C | -1.791062 | -3.109949 | 0.000000  |
| C | -2.355285 | -2.623203 | -1.224969 |
| C | -2.355285 | -2.623203 | 1.224969  |
| C | 0.755011  | 2.323684  | -3.221095 |
| C | -0.238333 | 3.045612  | -2.451559 |
| C | 0.382384  | 1.176856  | -4.002264 |
| C | -1.597350 | 2.604040  | -2.451559 |
| C | -2.355285 | 2.623203  | -1.224969 |
| C | -1.791062 | 3.109949  | 0.000000  |
| C | -2.355285 | 2.623203  | 1.224969  |
| C | -3.511206 | 0.742374  | 0.000000  |
| C | -3.222637 | 1.429395  | -1.224969 |
| C | -3.222637 | 1.429395  | 1.224969  |
| C | 2.443266  | 0.000000  | -3.221095 |
| C | 2.822900  | 1.167814  | -2.451559 |
| C | 1.237419  | 0.000000  | -4.002264 |



|    |           |           |           |
|----|-----------|-----------|-----------|
| C  | 1.982981  | 2.323863  | -2.451559 |
| C  | 1.766991  | 3.050624  | -1.224969 |
| C  | 2.404269  | 2.664428  | 0.000000  |
| C  | 1.766991  | 3.050624  | 1.224969  |
| C  | -0.378983 | 3.568762  | 0.000000  |
| C  | 0.363586  | 3.506617  | -1.224969 |
| C  | 0.363586  | 3.506617  | 1.224969  |
| C  | 3.276982  | 1.463242  | 0.000000  |
| C  | 3.447346  | 0.737813  | -1.224969 |
| C  | 3.447346  | 0.737813  | 1.224969  |
| C  | 0.755011  | 2.323684  | 3.221095  |
| C  | 1.982981  | 2.323863  | 2.451559  |
| C  | 2.822900  | 1.167814  | 2.451559  |
| C  | 0.382384  | 1.176856  | 4.002264  |
| C  | -1.976644 | 1.436116  | 3.221095  |
| C  | -1.597350 | 2.604040  | 2.451559  |
| C  | -0.238333 | 3.045612  | 2.451559  |
| C  | -1.001093 | 0.727337  | 4.002264  |
| C  | -1.976644 | -1.436116 | 3.221095  |
| C  | -2.970198 | -0.714477 | 2.451559  |
| C  | -2.970198 | 0.714477  | 2.451559  |
| C  | -1.001093 | -0.727337 | 4.002264  |
| C  | 0.755011  | -2.323684 | 3.221095  |
| C  | -0.238333 | -3.045612 | 2.451559  |
| C  | -1.597350 | -2.604040 | 2.451559  |
| C  | 0.382384  | -1.176856 | 4.002264  |
| C  | 2.443266  | 0.000000  | 3.221095  |
| C  | 2.822900  | -1.167814 | 2.451559  |
| C  | 1.982981  | -2.323863 | 2.451559  |
| C  | 1.237419  | 0.000000  | 4.002264  |
| He | 0.000000  | 0.000000  | 0.000000  |

He@C<sub>60</sub><sup>12-</sup>  
61

|   |            |            |           |
|---|------------|------------|-----------|
| C | -1.2508585 | 0.0000000  | 3.4425444 |
| C | -0.3865365 | -1.1896372 | 3.4425444 |
| C | 1.0119658  | -0.7352362 | 3.4425444 |
| C | 1.0119658  | 0.7352362  | 3.4425444 |
| C | -0.3865365 | 1.1896372  | 3.4425444 |
| C | 2.4250202  | -2.6706823 | 0.6344229 |
| C | 3.2893422  | -1.4810451 | 0.6344229 |
| C | 3.0504495  | -0.7458089 | 1.8852815 |
| C | 2.0384837  | -1.4810451 | 2.6583546 |
| C | 1.6519471  | -2.6706823 | 1.8852815 |
| C | 3.2893422  | 1.4810451  | 0.6344229 |
| C | 2.4250202  | 2.6706823  | 0.6344229 |
| C | 1.6519471  | 2.6706823  | 1.8852815 |
| C | 2.0384837  | 1.4810451  | 2.6583546 |

|    |            |            |            |
|----|------------|------------|------------|
| C  | 3.0504495  | 0.7458089  | 1.8852815  |
| C  | -0.3920949 | 3.5860185  | 0.6344229  |
| C  | -1.7905973 | 3.1316175  | 0.6344229  |
| C  | -2.0294900 | 2.3963813  | 1.8852815  |
| C  | -0.7786315 | 2.3963813  | 2.6583546  |
| C  | 0.2333343  | 3.1316175  | 1.8852815  |
| C  | -3.5316702 | 0.7352362  | 0.6344229  |
| C  | -3.5316702 | -0.7352362 | 0.6344229  |
| C  | -2.9062410 | -1.1896372 | 1.8852815  |
| C  | -2.5197044 | 0.0000000  | 2.6583546  |
| C  | -2.9062410 | 1.1896372  | 1.8852815  |
| C  | -1.7905973 | -3.1316175 | 0.6344229  |
| C  | -0.3920949 | -3.5860185 | 0.6344229  |
| C  | 0.2333343  | -3.1316175 | 1.8852815  |
| C  | -0.7786315 | -2.3963813 | 2.6583546  |
| C  | -2.0294900 | -2.3963813 | 1.8852815  |
| C  | -0.2333343 | -3.1316175 | -1.8852815 |
| C  | 0.7786315  | -2.3963813 | -2.6583546 |
| C  | 2.0294900  | -2.3963813 | -1.8852815 |
| C  | 1.7905973  | -3.1316175 | -0.6344229 |
| C  | 0.3920949  | -3.5860185 | -0.6344229 |
| C  | 2.9062410  | -1.1896372 | -1.8852815 |
| C  | 2.5197044  | 0.0000000  | -2.6583546 |
| C  | 2.9062410  | 1.1896372  | -1.8852815 |
| C  | 3.5316702  | 0.7352362  | -0.6344229 |
| C  | 3.5316702  | -0.7352362 | -0.6344229 |
| C  | 2.0294900  | 2.3963813  | -1.8852815 |
| C  | 0.7786315  | 2.3963813  | -2.6583546 |
| C  | -0.2333343 | 3.1316175  | -1.8852815 |
| C  | 0.3920949  | 3.5860185  | -0.6344229 |
| C  | 1.7905973  | 3.1316175  | -0.6344229 |
| C  | -1.6519471 | 2.6706823  | -1.8852815 |
| C  | -2.0384837 | 1.4810451  | -2.6583546 |
| C  | -3.0504495 | 0.7458089  | -1.8852815 |
| C  | -3.2893422 | 1.4810451  | -0.6344229 |
| C  | -2.4250202 | 2.6706823  | -0.6344229 |
| C  | -3.0504495 | -0.7458089 | -1.8852815 |
| C  | -2.0384837 | -1.4810451 | -2.6583546 |
| C  | -1.6519471 | -2.6706823 | -1.8852815 |
| C  | -2.4250202 | -2.6706823 | -0.6344229 |
| C  | -3.2893422 | -1.4810451 | -0.6344229 |
| C  | -1.0119658 | -0.7352362 | -3.4425444 |
| C  | -1.0119658 | 0.7352362  | -3.4425444 |
| C  | 0.3865365  | 1.1896372  | -3.4425444 |
| C  | 1.2508585  | 0.0000000  | -3.4425444 |
| C  | 0.3865365  | -1.1896372 | -3.4425444 |
| He | 0.0000000  | 0.0000000  | 0.0000000  |

$^3\text{He}@D_2(1)\text{-C}_{76}$

C 2.494936 2.732426 0.155695  
C 2.056021 2.652620 1.494392  
C 2.737679 1.708720 2.321460  
C 2.100485 1.168194 3.500117  
C 0.838892 1.618263 3.859816  
C -0.234543 3.366226 0.694448  
C 0.683736 3.051114 1.801846  
C 0.141786 2.597878 3.036004  
C -1.619406 3.181394 0.913544  
C -2.131940 2.647391 2.142615  
C -1.267982 2.359543 3.195049  
C 0.234543 3.366226 -0.694448  
C -0.683736 3.051114 -1.801846  
C 1.619406 3.181394 -0.913544  
C -0.141786 2.597878 -3.036004  
C 1.454294 -1.155095 3.983649  
C 0.145012 -0.686448 4.386612  
C 2.438182 -0.237129 3.599609  
C -0.145012 0.686448 4.386612  
C -1.454294 1.155095 3.983649  
C -0.838892 -1.618263 3.859816  
C -2.100485 -1.168194 3.500117  
C -2.438182 0.237129 3.599609  
C 3.221330 -1.746783 1.817636  
C 2.131940 -2.647391 2.142615  
C 3.332099 -0.536878 2.497823  
C 1.267982 -2.359543 3.195049  
C -0.141786 -2.597878 3.036004  
C 1.619406 -3.181394 0.913544  
C 0.234543 -3.366226 0.694448  
C -0.683736 -3.051114 1.801846  
C -2.056021 -2.652620 1.494392  
C -2.494936 -2.732426 0.155695  
C -2.737679 -1.708720 2.321460  
C 3.556602 -0.680758 -1.738586  
C 3.829065 -0.647678 -0.346077  
C 3.438832 -1.802254 0.393510  
C 2.494936 -2.732426 -0.155695  
C 2.056021 -2.652620 -1.494392  
C 2.737679 -1.708720 -2.321460  
C 0.838892 -1.618263 -3.859816  
C 2.100485 -1.168194 -3.500117  
C -1.619406 -3.181394 -0.913544  
C -0.234543 -3.366226 -0.694448  
C 0.683736 -3.051114 -1.801846  
C 0.141786 -2.597878 -3.036004  
C 3.829065 0.647678 0.346077  
C 3.556602 0.680758 1.738586  
C 3.332099 0.536878 -2.497823  
C 3.221330 1.746783 -1.817636  
C 3.438832 1.802254 -0.393510

|    |           |           |           |
|----|-----------|-----------|-----------|
| C  | 2.438182  | 0.237129  | -3.599609 |
| C  | 2.131940  | 2.647391  | -2.142615 |
| C  | 1.267982  | 2.359543  | -3.195049 |
| C  | 1.454294  | 1.155095  | -3.983649 |
| C  | -1.454294 | -1.155095 | -3.983649 |
| C  | -0.145012 | -0.686448 | -4.386612 |
| C  | 0.145012  | 0.686448  | -4.386612 |
| C  | -2.438182 | -0.237129 | -3.599609 |
| C  | -3.221330 | -1.746783 | -1.817636 |
| C  | -2.131940 | -2.647391 | -2.142615 |
| C  | -1.267982 | -2.359543 | -3.195049 |
| C  | -3.332099 | -0.536878 | -2.497823 |
| C  | -3.556602 | -0.680758 | 1.738586  |
| C  | -3.829065 | -0.647678 | 0.346077  |
| C  | -3.438832 | -1.802254 | -0.393510 |
| C  | -3.438832 | 1.802254  | 0.393510  |
| C  | -3.221330 | 1.746783  | 1.817636  |
| C  | -3.332099 | 0.536878  | 2.497823  |
| C  | -3.556602 | 0.680758  | -1.738586 |
| C  | -3.829065 | 0.647678  | -0.346077 |
| C  | -0.838892 | 1.618263  | -3.859816 |
| C  | -2.100485 | 1.168194  | -3.500117 |
| C  | -2.737679 | 1.708720  | -2.321460 |
| C  | -2.056021 | 2.652620  | -1.494392 |
| C  | -2.494936 | 2.732426  | -0.155695 |
| He | 0.000000  | 0.000000  | 0.000000  |

${}^3\text{He}@D_2(1)\text{-C}_{76}^{6-}$

77

|   |           |           |           |
|---|-----------|-----------|-----------|
| C | 2.508492  | 2.778565  | 0.147598  |
| C | 2.058321  | 2.682920  | 1.492218  |
| C | 2.750385  | 1.744396  | 2.342531  |
| C | 2.105282  | 1.185335  | 3.500094  |
| C | 0.823963  | 1.635461  | 3.879048  |
| C | -0.233405 | 3.394291  | 0.695316  |
| C | 0.683149  | 3.075411  | 1.800783  |
| C | 0.134237  | 2.622234  | 3.064285  |
| C | -1.645199 | 3.209773  | 0.915831  |
| C | -2.152607 | 2.639343  | 2.147238  |
| C | -1.277677 | 2.351730  | 3.209067  |
| C | 0.233405  | 3.394291  | -0.695316 |
| C | -0.683149 | 3.075411  | -1.800783 |
| C | 1.645199  | 3.209773  | -0.915831 |
| C | -0.134237 | 2.622234  | -3.064285 |
| C | 1.462220  | -1.158066 | 4.024603  |
| C | 0.158744  | -0.706199 | 4.431505  |
| C | 2.482369  | -0.217808 | 3.626628  |
| C | -0.158744 | 0.706199  | 4.431505  |
| C | -1.462220 | 1.158066  | 4.024603  |
| C | -0.823963 | -1.635461 | 3.879048  |
| C | -2.105282 | -1.185335 | 3.500094  |

C -2.482369 0.217808 3.626628  
C 3.254639 -1.755244 1.827578  
C 2.152607 -2.639343 2.147238  
C 3.369604 -0.513541 2.535307  
C 1.277677 -2.351730 3.209067  
C -0.134237 -2.622234 3.064285  
C 1.645199 -3.209773 0.915831  
C 0.233405 -3.394291 0.695316  
C -0.683149 -3.075411 1.800783  
C -2.058321 -2.682920 1.492218  
C -2.508492 -2.778565 0.147598  
C -2.750385 -1.744396 2.342531  
C 3.579232 -0.692666 -1.754431  
C 3.835537 -0.651552 -0.349046  
C 3.466624 -1.815358 0.412429  
C 2.508492 -2.778565 -0.147598  
C 2.058321 -2.682920 -1.492218  
C 2.750385 -1.744396 -2.342531  
C 0.823963 -1.635461 -3.879048  
C 2.105282 -1.185335 -3.500094  
C -1.645199 -3.209773 -0.915831  
C -0.233405 -3.394291 -0.695316  
C 0.683149 -3.075411 -1.800783  
C 0.134237 -2.622234 -3.064285  
C 3.835537 0.651552 0.349046  
C 3.579232 0.692666 1.754431  
C 3.369604 0.513541 -2.535307  
C 3.254639 1.755244 -1.827578  
C 3.466624 1.815358 -0.412429  
C 2.482369 0.217808 -3.626628  
C 2.152607 2.639343 -2.147238  
C 1.277677 2.351730 -3.209067  
C 1.462220 1.158066 -4.024603  
C -1.462220 -1.158066 -4.024603  
C -0.158744 -0.706199 -4.431505  
C 0.158744 0.706199 -4.431505  
C -2.482369 -0.217808 -3.626628  
C -3.254639 -1.755244 -1.827578  
C -2.152607 -2.639343 -2.147238  
C -1.277677 -2.351730 -3.209067  
C -3.369604 -0.513541 -2.535307  
C -3.579232 -0.692666 1.754431  
C -3.835537 -0.651552 0.349046  
C -3.466624 -1.815358 -0.412429  
C -3.466624 1.815358 0.412429  
C -3.254639 1.755244 1.827578  
C -3.369604 0.513541 2.535307  
C -3.579232 0.692666 -1.754431  
C -3.835537 0.651552 -0.349046  
C -0.823963 1.635461 -3.879048  
C -2.105282 1.185335 -3.500094

|    |           |          |           |
|----|-----------|----------|-----------|
| C  | -2.750385 | 1.744396 | -2.342531 |
| C  | -2.058321 | 2.682920 | -1.492218 |
| C  | -2.508492 | 2.778565 | -0.147598 |
| He | 0.000000  | 0.000000 | 0.000000  |

<sup>3</sup>He@C<sub>2v</sub>(3)-C<sub>78</sub>

79

|   |            |            |            |
|---|------------|------------|------------|
| C | -4.2203308 | 0.7024274  | -1.1786338 |
| C | -3.4209249 | 1.4167659  | -2.1526726 |
| C | -4.2203308 | -0.7024274 | -1.1786338 |
| C | -2.7195808 | 0.7269888  | -3.1315672 |
| C | -0.7300994 | 3.6232641  | -0.8608514 |
| C | -2.7842771 | 2.5404005  | -1.5010243 |
| C | -1.4670668 | 2.9622493  | -1.8725894 |
| C | -0.7363867 | 2.2557879  | -2.9287531 |
| C | 0.7363867  | 2.2557879  | -2.9287531 |
| C | -1.4109792 | 1.1764973  | -3.5571238 |
| C | 1.4109792  | 1.1764973  | -3.5571238 |
| C | -4.0652503 | -0.7247791 | 1.2708446  |
| C | -4.0652503 | 0.7247791  | 1.2708446  |
| C | -4.1124124 | -1.4220479 | 0.0669329  |
| C | -4.1124124 | 1.4220479  | 0.0669329  |
| C | -3.2261767 | 2.5612679  | -0.1307567 |
| C | -2.3802638 | 3.0250714  | 0.9093797  |
| C | -1.1828650 | 3.6782315  | 0.4883923  |
| C | -1.1844819 | -2.3563407 | 2.9936794  |
| C | -2.3785923 | -2.3211314 | 2.2006365  |
| C | -3.2005603 | -1.1719419 | 2.3423626  |
| C | -2.7208138 | 0.0000000  | 3.0342254  |
| C | -0.7321730 | 1.2237842  | 3.7223276  |
| C | -1.4598012 | 0.0000000  | 3.7007721  |
| C | -0.7321730 | -1.2237842 | 3.7223276  |
| C | -2.3785923 | 2.3211314  | 2.2006365  |
| C | -3.2005603 | 1.1719419  | 2.3423626  |
| C | -1.1844819 | 2.3563407  | 2.9936794  |
| C | -2.3802638 | -3.0250714 | 0.9093797  |
| C | -3.2261767 | -2.5612679 | -0.1307567 |
| C | 0.0000000  | -3.0623011 | 2.5453930  |
| C | 0.0000000  | -3.6993809 | 1.3226193  |
| C | -1.1828650 | -3.6782315 | 0.4883923  |
| C | 1.1844819  | -2.3563407 | 2.9936794  |
| C | 2.3785923  | -2.3211314 | 2.2006365  |
| C | 3.2005603  | -1.1719419 | 2.3423626  |
| C | 0.7321730  | 1.2237842  | 3.7223276  |
| C | 1.4598012  | 0.0000000  | 3.7007721  |
| C | 0.7321730  | -1.2237842 | 3.7223276  |
| C | 2.7208138  | 0.0000000  | 3.0342254  |
| C | -0.7300994 | -3.6232641 | -0.8608514 |
| C | -1.4670668 | -2.9622493 | -1.8725894 |
| C | -2.7842771 | -2.5404005 | -1.5010243 |

|    |            |            |            |
|----|------------|------------|------------|
| C  | -3.4209249 | -1.4167659 | -2.1526726 |
| C  | -2.7195808 | -0.7269888 | -3.1315672 |
| C  | 0.7363867  | -2.2557879 | -2.9287531 |
| C  | -0.7363867 | -2.2557879 | -2.9287531 |
| C  | -1.4109792 | -1.1764973 | -3.5571238 |
| C  | 1.4109792  | -1.1764973 | -3.5571238 |
| C  | 0.6881402  | 0.0000000  | -3.9610292 |
| C  | -0.6881402 | 0.0000000  | -3.9610292 |
| C  | 0.7300994  | -3.6232641 | -0.8608514 |
| C  | 2.7842771  | -2.5404005 | -1.5010243 |
| C  | 1.4670668  | -2.9622493 | -1.8725894 |
| C  | 2.3802638  | -3.0250714 | 0.9093797  |
| C  | 1.1828650  | -3.6782315 | 0.4883923  |
| C  | 3.2261767  | -2.5612679 | -0.1307567 |
| C  | 4.2203308  | -0.7024274 | -1.1786338 |
| C  | 3.4209249  | -1.4167659 | -2.1526726 |
| C  | 2.7195808  | -0.7269888 | -3.1315672 |
| C  | 4.2203308  | 0.7024274  | -1.1786338 |
| C  | 4.0652503  | 0.7247791  | 1.2708446  |
| C  | 4.0652503  | -0.7247791 | 1.2708446  |
| C  | 4.1124124  | -1.4220479 | 0.0669329  |
| C  | 4.1124124  | 1.4220479  | 0.0669329  |
| C  | 1.1844819  | 2.3563407  | 2.9936794  |
| C  | 2.3785923  | 2.3211314  | 2.2006365  |
| C  | 3.2005603  | 1.1719419  | 2.3423626  |
| C  | 1.1828650  | 3.6782315  | 0.4883923  |
| C  | 0.0000000  | 3.6993809  | 1.3226193  |
| C  | 0.0000000  | 3.0623011  | 2.5453930  |
| C  | 3.2261767  | 2.5612679  | -0.1307567 |
| C  | 2.3802638  | 3.0250714  | 0.9093797  |
| C  | 2.7195808  | 0.7269888  | -3.1315672 |
| C  | 3.4209249  | 1.4167659  | -2.1526726 |
| C  | 2.7842771  | 2.5404005  | -1.5010243 |
| C  | 1.4670668  | 2.9622493  | -1.8725894 |
| C  | 0.7300994  | 3.6232641  | -0.8608514 |
| He | 0.0000000  | 0.0000000  | -0.0062950 |

${}^3\text{He}@C_{2v}(3)-C_{78}^{6-}$

79

|   |            |            |            |
|---|------------|------------|------------|
| C | -4.2232777 | 0.7241387  | -1.1956839 |
| C | -3.4238861 | 1.4292110  | -2.1654995 |
| C | -4.2232777 | -0.7241387 | -1.1956839 |
| C | -2.7097489 | 0.7372374  | -3.1748378 |
| C | -0.7153111 | 3.6781023  | -0.8814659 |
| C | -2.7809377 | 2.5618442  | -1.5211131 |
| C | -1.4612182 | 2.9862573  | -1.8903966 |
| C | -0.7269984 | 2.2963926  | -2.9625710 |
| C | 0.7269984  | 2.2963926  | -2.9625710 |
| C | -1.4304019 | 1.1950357  | -3.6197941 |
| C | 1.4304019  | 1.1950357  | -3.6197941 |

|   |            |            |            |
|---|------------|------------|------------|
| C | -4.0523853 | -0.7278566 | 1.2916277  |
| C | -4.0523853 | 0.7278566  | 1.2916277  |
| C | -4.0938285 | -1.4341469 | 0.0583289  |
| C | -4.0938285 | 1.4341469  | 0.0583289  |
| C | -3.2251852 | 2.5771437  | -0.1305331 |
| C | -2.3627160 | 3.0404113  | 0.9206488  |
| C | -1.1703419 | 3.7240231  | 0.5063757  |
| C | -1.1738362 | -2.3946629 | 3.0249239  |
| C | -2.3631041 | -2.3416585 | 2.2161190  |
| C | -3.2037763 | -1.1789247 | 2.3644643  |
| C | -2.7239997 | 0.0000000  | 3.0770889  |
| C | -0.7201233 | 1.2326145  | 3.7788244  |
| C | -1.4590256 | 0.0000000  | 3.7335154  |
| C | -0.7201233 | -1.2326145 | 3.7788244  |
| C | -2.3631041 | 2.3416585  | 2.2161190  |
| C | -3.2037763 | 1.1789247  | 2.3644643  |
| C | -1.1738362 | 2.3946629  | 3.0249239  |
| C | -2.3627160 | -3.0404113 | 0.9206488  |
| C | -3.2251852 | -2.5771437 | -0.1305331 |
| C | 0.0000000  | -3.1104509 | 2.5961524  |
| C | -0.0000000 | -3.7685096 | 1.3383531  |
| C | -1.1703419 | -3.7240231 | 0.5063757  |
| C | 1.1738362  | -2.3946629 | 3.0249239  |
| C | 2.3631041  | -2.3416585 | 2.2161190  |
| C | 3.2037763  | -1.1789247 | 2.3644643  |
| C | 0.7201233  | 1.2326145  | 3.7788244  |
| C | 1.4590256  | 0.0000000  | 3.7335154  |
| C | 0.7201233  | -1.2326145 | 3.7788244  |
| C | 2.7239997  | 0.0000000  | 3.0770889  |
| C | -0.7153111 | -3.6781023 | -0.8814659 |
| C | -1.4612182 | -2.9862573 | -1.8903966 |
| C | -2.7809377 | -2.5618442 | -1.5211131 |
| C | -3.4238861 | -1.4292110 | -2.1654995 |
| C | -2.7097489 | -0.7372374 | -3.1748378 |
| C | 0.7269984  | -2.2963926 | -2.9625710 |
| C | -0.7269984 | -2.2963926 | -2.9625710 |
| C | -1.4304019 | -1.1950357 | -3.6197941 |
| C | 1.4304019  | -1.1950357 | -3.6197941 |
| C | 0.6883005  | 0.0000000  | -3.9806847 |
| C | -0.6883005 | 0.0000000  | -3.9806847 |
| C | 0.7153111  | -3.6781023 | -0.8814659 |
| C | 2.7809377  | -2.5618442 | -1.5211131 |
| C | 1.4612182  | -2.9862573 | -1.8903966 |
| C | 2.3627160  | -3.0404113 | 0.9206488  |
| C | 1.1703419  | -3.7240231 | 0.5063757  |
| C | 3.2251852  | -2.5771437 | -0.1305331 |
| C | 4.2232777  | -0.7241387 | -1.1956839 |
| C | 3.4238861  | -1.4292110 | -2.1654995 |
| C | 2.7097489  | -0.7372374 | -3.1748378 |
| C | 4.2232777  | 0.7241387  | -1.1956839 |
| C | 4.0523853  | 0.7278566  | 1.2916277  |



|    |            |            |            |
|----|------------|------------|------------|
| C  | 4.0523853  | -0.7278566 | 1.2916277  |
| C  | 4.0938285  | -1.4341469 | 0.0583289  |
| C  | 4.0938285  | 1.4341469  | 0.0583289  |
| C  | 1.1738362  | 2.3946629  | 3.0249239  |
| C  | 2.3631041  | 2.3416585  | 2.2161190  |
| C  | 3.2037763  | 1.1789247  | 2.3644643  |
| C  | 1.1703419  | 3.7240231  | 0.5063757  |
| C  | -0.0000000 | 3.7685096  | 1.3383531  |
| C  | 0.0000000  | 3.1104509  | 2.5961524  |
| C  | 3.2251852  | 2.5771437  | -0.1305331 |
| C  | 2.3627160  | 3.0404113  | 0.9206488  |
| C  | 2.7097489  | 0.7372374  | -3.1748378 |
| C  | 3.4238861  | 1.4292110  | -2.1654995 |
| C  | 2.7809377  | 2.5618442  | -1.5211131 |
| C  | 1.4612182  | 2.9862573  | -1.8903966 |
| C  | 0.7153111  | 3.6781023  | -0.8814659 |
| He | 0.0000000  | 0.0000000  | -0.0065209 |

<sup>3</sup>He@C<sub>2v</sub>(2)-C<sub>78</sub>

79

|   |           |           |           |
|---|-----------|-----------|-----------|
| C | 4.297455  | 0.720081  | 1.173464  |
| C | 3.451155  | 1.156567  | 2.274434  |
| C | 4.256114  | 1.420562  | -0.041708 |
| C | 2.719780  | 2.325637  | 2.169366  |
| C | 1.405290  | 2.401555  | 2.744727  |
| C | 4.147891  | -0.696067 | -1.289438 |
| C | 4.256114  | -1.420562 | -0.041708 |
| C | 4.147891  | 0.696067  | -1.289438 |
| C | 4.297455  | -0.720081 | 1.173464  |
| C | 3.451155  | -1.156567 | 2.274434  |
| C | 3.430783  | -2.604756 | -0.166608 |
| C | 2.721152  | -3.082872 | 0.924212  |
| C | 2.719780  | -2.325637 | 2.169366  |
| C | 2.842831  | 0.000000  | 2.893722  |
| C | 1.474527  | 0.000000  | 3.319698  |
| C | 0.734480  | 1.261491  | 3.276638  |
| C | 1.180161  | -1.413626 | -3.422137 |
| C | 2.380623  | -0.735123 | -3.064369 |
| C | 3.234810  | -1.421402 | -2.162139 |
| C | 1.466340  | -3.121079 | -1.640538 |
| C | 0.727715  | -2.568802 | -2.715539 |
| C | 2.787831  | -2.595922 | -1.463059 |
| C | 2.380623  | 0.735123  | -3.064369 |
| C | 3.234810  | 1.421402  | -2.162139 |
| C | 0.000000  | -0.690719 | -3.843653 |
| C | 0.000000  | 0.690719  | -3.843653 |
| C | 1.180161  | 1.413626  | -3.422137 |
| C | -1.180161 | -1.413626 | -3.422137 |
| C | -2.380623 | -0.735123 | -3.064369 |
| C | -3.234810 | -1.421402 | -2.162139 |
| C | -1.466340 | -3.121079 | -1.640538 |

|    |           |           |           |
|----|-----------|-----------|-----------|
| C  | -0.727715 | -2.568802 | -2.715539 |
| C  | -2.787831 | -2.595922 | -1.463059 |
| C  | -0.735496 | -3.675498 | -0.497905 |
| C  | 1.409010  | -3.661834 | 0.753608  |
| C  | 0.735496  | -3.675498 | -0.497905 |
| C  | -1.409010 | -3.661834 | 0.753608  |
| C  | 0.727715  | 2.568802  | -2.715539 |
| C  | 1.466340  | 3.121079  | -1.640538 |
| C  | 2.787831  | 2.595922  | -1.463059 |
| C  | 3.430783  | 2.604756  | -0.166608 |
| C  | 2.721152  | 3.082872  | 0.924212  |
| C  | -0.735496 | 3.675498  | -0.497905 |
| C  | 0.735496  | 3.675498  | -0.497905 |
| C  | 1.409010  | 3.661834  | 0.753608  |
| C  | -1.409010 | 3.661834  | 0.753608  |
| C  | -0.684591 | 3.373888  | 1.962070  |
| C  | 0.684591  | 3.373888  | 1.962070  |
| C  | -0.727715 | 2.568802  | -2.715539 |
| C  | -2.787831 | 2.595922  | -1.463059 |
| C  | -1.466340 | 3.121079  | -1.640538 |
| C  | -2.380623 | 0.735123  | -3.064369 |
| C  | -1.180161 | 1.413626  | -3.422137 |
| C  | -3.234810 | 1.421402  | -2.162139 |
| C  | -4.256114 | 1.420562  | -0.041708 |
| C  | -3.430783 | 2.604756  | -0.166608 |
| C  | -2.721152 | 3.082872  | 0.924212  |
| C  | -4.297455 | 0.720081  | 1.173464  |
| C  | -4.256114 | -1.420562 | -0.041708 |
| C  | -4.147891 | -0.696067 | -1.289438 |
| C  | -4.147891 | 0.696067  | -1.289438 |
| C  | -4.297455 | -0.720081 | 1.173464  |
| C  | -2.719780 | -2.325637 | 2.169366  |
| C  | -2.721152 | -3.082872 | 0.924212  |
| C  | -3.430783 | -2.604756 | -0.166608 |
| C  | -3.451155 | -1.156567 | 2.274434  |
| C  | 0.684591  | -3.373888 | 1.962070  |
| C  | -1.405290 | -2.401555 | 2.744727  |
| C  | -0.684591 | -3.373888 | 1.962070  |
| C  | -2.719780 | 2.325637  | 2.169366  |
| C  | -1.405290 | 2.401555  | 2.744727  |
| C  | -0.734480 | 1.261491  | 3.276638  |
| C  | -3.451155 | 1.156567  | 2.274434  |
| C  | -2.842831 | 0.000000  | 2.893722  |
| C  | -1.474527 | 0.000000  | 3.319698  |
| C  | -0.734480 | -1.261491 | 3.276638  |
| C  | 0.734480  | -1.261491 | 3.276638  |
| C  | 1.405290  | -2.401555 | 2.744727  |
| He | 0.000000  | 0.000000  | -0.065672 |

${}^3\text{He}@C_{2v}(2)-C_{78}^4$

C 4.310317 0.716336 1.176474  
C 3.455707 1.155353 2.268963  
C 4.268401 1.442448 -0.056769  
C 2.718599 2.332221 2.167806  
C 1.407015 2.407092 2.758184  
C 4.139116 -0.707783 -1.303572  
C 4.268401 -1.442448 -0.056769  
C 4.139116 0.707783 -1.303572  
C 4.310317 -0.716336 1.176474  
C 3.455707 -1.155353 2.268963  
C 3.446401 -2.619925 -0.172210  
C 2.725672 -3.114885 0.936329  
C 2.718599 -2.332221 2.167806  
C 2.846501 0.000000 2.901264  
C 1.476885 0.000000 3.337656  
C 0.733223 1.261210 3.299478  
C 1.169874 -1.416797 -3.444859  
C 2.366836 -0.733679 -3.072795  
C 3.239811 -1.426524 -2.169948  
C 1.466820 -3.132820 -1.636031  
C 0.715476 -2.596868 -2.723440  
C 2.792771 -2.618782 -1.464519  
C 2.366836 0.733679 -3.072795  
C 3.239811 1.426524 -2.169948  
C 0.000000 -0.706088 -3.880595  
C 0.000000 0.706088 -3.880595  
C 1.169874 1.416797 -3.444859  
C -1.169874 -1.416797 -3.444859  
C -2.366836 -0.733679 -3.072795  
C -3.239811 -1.426524 -2.169948  
C -1.466820 -3.132820 -1.636031  
C -0.715476 -2.596868 -2.723440  
C -2.792771 -2.618782 -1.464519  
C -0.731630 -3.696025 -0.493291  
C 1.428487 -3.697087 0.772524  
C 0.731630 -3.696025 -0.493291  
C -1.428487 -3.697087 0.772524  
C 0.715476 2.596868 -2.723440  
C 1.466820 3.132820 -1.636031  
C 2.792771 2.618782 -1.464519  
C 3.446401 2.619925 -0.172210  
C 2.725672 3.114885 0.936329  
C -0.731630 3.696025 -0.493291  
C 0.731630 3.696025 -0.493291  
C 1.428487 3.697087 0.772524  
C -1.428487 3.697087 0.772524  
C -0.684357 3.380761 1.976359  
C 0.684357 3.380761 1.976359  
C -0.715476 2.596868 -2.723440  
C -2.792771 2.618782 -1.464519

C -1.466820 3.132820 -1.636031  
C -2.366836 0.733679 -3.072795  
C -1.169874 1.416797 -3.444859  
C -3.239811 1.426524 -2.169948  
C -4.268401 1.442448 -0.056769  
C -3.446401 2.619925 -0.172210  
C -2.725672 3.114885 0.936329  
C -4.310317 0.716336 1.176474  
C -4.268401 -1.442448 -0.056769  
C -4.139116 -0.707783 -1.303572  
C -4.139116 0.707783 -1.303572  
C -4.310317 -0.716336 1.176474  
C -2.718599 -2.332221 2.167806  
C -2.725672 -3.114885 0.936329  
C -3.446401 -2.619925 -0.172210  
C -3.455707 -1.155353 2.268963  
C 0.684357 -3.380761 1.976359  
C -1.407015 -2.407092 2.758184  
C -0.684357 -3.380761 1.976359  
C -2.718599 2.332221 2.167806  
C -1.407015 2.407092 2.758184  
C -0.733223 1.261210 3.299478  
C -3.455707 1.155353 2.268963  
C -2.846501 0.000000 2.901264  
C -1.476885 0.000000 3.337656  
C -0.733223 -1.261210 3.299478  
C 0.733223 -1.261210 3.299478  
C 1.407015 -2.407092 2.758184  
He 0.000000 0.000000 -0.023514

<sup>3</sup>He@D<sub>2</sub>(22)C<sub>84</sub>

85

C 1.8491708 2.8103378 -2.5881277  
C -1.8491708 -2.8103378 -2.5881277  
C 1.8491708 -2.8103378 2.5881277  
C -1.8491708 2.8103378 2.5881277  
C 2.2232790 1.5948981 -3.2491144  
C -2.2232790 -1.5948981 -3.2491144  
C 2.2232790 -1.5948981 3.2491144  
C -2.2232790 1.5948981 3.2491144  
C 3.2865029 0.8664422 -2.6391387  
C -3.2865029 -0.8664422 -2.6391387  
C 3.2865029 -0.8664422 2.6391387  
C -3.2865029 0.8664422 2.6391387  
C 2.3501153 3.1557694 -1.2889386  
C -2.3501153 -3.1557694 -1.2889386  
C 2.3501153 -3.1557694 1.2889386  
C -2.3501153 3.1557694 1.2889386  
C 3.3036715 2.3483198 -0.6063467  
C -3.3036715 -2.3483198 -0.6063467  
C 3.3036715 -2.3483198 0.6063467

|   |            |            |            |
|---|------------|------------|------------|
| C | -3.3036715 | 2.3483198  | 0.6063467  |
| C | 3.8300235  | 1.2445604  | -1.3612913 |
| C | -3.8300235 | -1.2445604 | -1.3612913 |
| C | 3.8300235  | -1.2445604 | 1.3612913  |
| C | -3.8300235 | 1.2445604  | 1.3612913  |
| C | 1.1996366  | 0.8618370  | -4.0185667 |
| C | -1.1996366 | -0.8618370 | -4.0185667 |
| C | 1.1996366  | -0.8618370 | 4.0185667  |
| C | -1.1996366 | 0.8618370  | 4.0185667  |
| C | 1.2905745  | -0.5633631 | -4.1083085 |
| C | -1.2905745 | 0.5633631  | -4.1083085 |
| C | 1.2905745  | 0.5633631  | 4.1083085  |
| C | -1.2905745 | -0.5633631 | 4.1083085  |
| C | 0.4862603  | 3.3048152  | -2.6587567 |
| C | -0.4862603 | -3.3048152 | -2.6587567 |
| C | 0.4862603  | -3.3048152 | 2.6587567  |
| C | -0.4862603 | 3.3048152  | 2.6587567  |
| C | -0.4749585 | 2.6259414  | -3.3888753 |
| C | 0.4749585  | -2.6259414 | -3.3888753 |
| C | -0.4749585 | -2.6259414 | 3.3888753  |
| C | 0.4749585  | 2.6259414  | 3.3888753  |
| C | -0.1248888 | 1.4017602  | -4.0988223 |
| C | 0.1248888  | -1.4017602 | -4.0988223 |
| C | -0.1248888 | -1.4017602 | 4.0988223  |
| C | 0.1248888  | 1.4017602  | 4.0988223  |
| C | 0.1268704  | 3.9091352  | -1.3937711 |
| C | -0.1268704 | -3.9091352 | -1.3937711 |
| C | 0.1268704  | -3.9091352 | 1.3937711  |
| C | -0.1268704 | 3.9091352  | 1.3937711  |
| C | -1.1972966 | 3.7672225  | -0.8570016 |
| C | 1.1972966  | -3.7672225 | -0.8570016 |
| C | -1.1972966 | -3.7672225 | 0.8570016  |
| C | 1.1972966  | 3.7672225  | 0.8570016  |
| C | -1.2928113 | 3.8494022  | 0.5567911  |
| C | 1.2928113  | -3.8494022 | 0.5567911  |
| C | -1.2928113 | -3.8494022 | -0.5567911 |
| C | 1.2928113  | 3.8494022  | -0.5567911 |
| C | 2.2111358  | 3.0018149  | 1.6006869  |
| C | -2.2111358 | -3.0018149 | 1.6006869  |
| C | 2.2111358  | -3.0018149 | -1.6006869 |
| C | -2.2111358 | 3.0018149  | -1.6006869 |
| C | 3.8323415  | 1.1228852  | 1.4774049  |
| C | -3.8323415 | -1.1228852 | 1.4774049  |
| C | 3.8323415  | -1.1228852 | -1.4774049 |
| C | -3.8323415 | 1.1228852  | -1.4774049 |
| C | 3.2594827  | 2.2785790  | 0.8640698  |
| C | -3.2594827 | -2.2785790 | 0.8640698  |
| C | 3.2594827  | -2.2785790 | -0.8640698 |
| C | -3.2594827 | 2.2785790  | -0.8640698 |
| C | 1.8403896  | 2.5200696  | 2.8930019  |
| C | -1.8403896 | -2.5200696 | 2.8930019  |

|   |            |            |            |
|---|------------|------------|------------|
| C | 1.8403896  | -2.5200696 | -2.8930019 |
| C | -1.8403896 | 2.5200696  | -2.8930019 |
| C | -2.3583556 | 1.2853882  | -3.4225057 |
| C | 2.3583556  | -1.2853882 | -3.4225057 |
| C | -2.3583556 | -1.2853882 | 3.4225057  |
| C | 2.3583556  | 1.2853882  | 3.4225057  |
| C | -3.3328006 | 0.5899070  | -2.7186666 |
| C | 3.3328006  | -0.5899070 | -2.7186666 |
| C | -3.3328006 | -0.5899070 | 2.7186666  |
| C | 3.3328006  | 0.5899070  | 2.7186666  |
| C | 4.2445694  | -0.0268942 | 0.6901315  |
| C | -4.2445694 | 0.0268942  | 0.6901315  |
| C | 4.2445694  | 0.0268942  | -0.6901315 |
| C | -4.2445694 | -0.0268942 | -0.6901315 |

<sup>3</sup>He@D<sub>2</sub>(22)C<sub>84</sub><sup>6-</sup>

85

|   |            |            |            |
|---|------------|------------|------------|
| C | 1.8495751  | 2.8458988  | -2.6044524 |
| C | -1.8495751 | -2.8458988 | -2.6044524 |
| C | 1.8495751  | -2.8458988 | 2.6044524  |
| C | -1.8495751 | 2.8458988  | 2.6044524  |
| C | 2.2196345  | 1.6119381  | -3.2532189 |
| C | -2.2196345 | -1.6119381 | -3.2532189 |
| C | 2.2196345  | -1.6119381 | 3.2532189  |
| C | -2.2196345 | 1.6119381  | 3.2532189  |
| C | 3.3004063  | 0.8811391  | -2.6547315 |
| C | -3.3004063 | -0.8811391 | -2.6547315 |
| C | 3.3004063  | -0.8811391 | 2.6547315  |
| C | -3.3004063 | 0.8811391  | 2.6547315  |
| C | 2.3620021  | 3.1881757  | -1.2699702 |
| C | -2.3620021 | -3.1881757 | -1.2699702 |
| C | 2.3620021  | -3.1881757 | 1.2699702  |
| C | -2.3620021 | 3.1881757  | 1.2699702  |
| C | 3.3150039  | 2.3620858  | -0.5878431 |
| C | -3.3150039 | -2.3620858 | -0.5878431 |
| C | 3.3150039  | -2.3620858 | 0.5878431  |
| C | -3.3150039 | 2.3620858  | 0.5878431  |
| C | 3.8719897  | 1.2639502  | -1.3590266 |
| C | -3.8719897 | -1.2639502 | -1.3590266 |
| C | 3.8719897  | -1.2639502 | 1.3590266  |
| C | -3.8719897 | 1.2639502  | 1.3590266  |
| C | 1.1980729  | 0.8762876  | -4.0432096 |
| C | -1.1980729 | -0.8762876 | -4.0432096 |
| C | 1.1980729  | -0.8762876 | 4.0432096  |
| C | -1.1980729 | 0.8762876  | 4.0432096  |
| C | 1.3172522  | -0.5606300 | -4.1711996 |
| C | -1.3172522 | 0.5606300  | -4.1711996 |
| C | 1.3172522  | 0.5606300  | 4.1711996  |
| C | -1.3172522 | -0.5606300 | 4.1711996  |
| C | 0.4962536  | 3.3331727  | -2.6775018 |

|   |            |            |            |
|---|------------|------------|------------|
| C | -0.4962536 | -3.3331727 | -2.6775018 |
| C | 0.4962536  | -3.3331727 | 2.6775018  |
| C | -0.4962536 | 3.3331727  | 2.6775018  |
| C | -0.4833102 | 2.6385368  | -3.4392404 |
| C | 0.4833102  | -2.6385368 | -3.4392404 |
| C | -0.4833102 | -2.6385368 | 3.4392404  |
| C | 0.4833102  | 2.6385368  | 3.4392404  |
| C | -0.1243115 | 1.4269346  | -4.1471034 |
| C | 0.1243115  | -1.4269346 | -4.1471034 |
| C | -0.1243115 | -1.4269346 | 4.1471034  |
| C | 0.1243115  | 1.4269346  | 4.1471034  |
| C | 0.1308379  | 3.9218501  | -1.4153312 |
| C | -0.1308379 | -3.9218501 | -1.4153312 |
| C | 0.1308379  | -3.9218501 | 1.4153312  |
| C | -0.1308379 | 3.9218501  | 1.4153312  |
| C | -1.2000897 | 3.7652107  | -0.8754144 |
| C | 1.2000897  | -3.7652107 | -0.8754144 |
| C | -1.2000897 | -3.7652107 | 0.8754144  |
| C | 1.2000897  | 3.7652107  | 0.8754144  |
| C | -1.3128381 | 3.8636898  | 0.5509961  |
| C | 1.3128381  | -3.8636898 | 0.5509961  |
| C | -1.3128381 | -3.8636898 | -0.5509961 |
| C | 1.3128381  | 3.8636898  | -0.5509961 |
| C | 2.2107933  | 2.9968623  | 1.6210958  |
| C | -2.2107933 | -2.9968623 | 1.6210958  |
| C | 2.2107933  | -2.9968623 | -1.6210958 |
| C | -2.2107933 | 2.9968623  | -1.6210958 |
| C | 3.8552545  | 1.1043303  | 1.5054775  |
| C | -3.8552545 | -1.1043303 | 1.5054775  |
| C | 3.8552545  | -1.1043303 | -1.5054775 |
| C | -3.8552545 | 1.1043303  | -1.5054775 |
| C | 3.2615735  | 2.2786866  | 0.8820798  |
| C | -3.2615735 | -2.2786866 | 0.8820798  |
| C | 3.2615735  | -2.2786866 | -0.8820798 |
| C | -3.2615735 | 2.2786866  | -0.8820798 |
| C | 1.8364347  | 2.5173405  | 2.9434198  |
| C | -1.8364347 | -2.5173405 | 2.9434198  |
| C | 1.8364347  | -2.5173405 | -2.9434198 |
| C | -1.8364347 | 2.5173405  | -2.9434198 |
| C | -2.3579490 | 1.2666271  | -3.4714012 |
| C | 2.3579490  | -1.2666271 | -3.4714012 |
| C | -2.3579490 | -1.2666271 | 3.4714012  |
| C | 2.3579490  | 1.2666271  | 3.4714012  |
| C | -3.3469546 | 0.5659350  | -2.7428697 |
| C | 3.3469546  | -0.5659350 | -2.7428697 |
| C | -3.3469546 | -0.5659350 | 2.7428697  |
| C | 3.3469546  | 0.5659350  | 2.7428697  |
| C | 4.2597527  | -0.0402021 | 0.7031171  |
| C | -4.2597527 | 0.0402021  | 0.7031171  |
| C | 4.2597527  | 0.0402021  | -0.7031171 |
| C | -4.2597527 | -0.0402021 | -0.7031171 |

He 0.000000 0.000000 0.000000

${}^3\text{He}@D_{2d}(4)C_{84}$   
85

|   |            |            |            |
|---|------------|------------|------------|
| C | -2.0872456 | -3.1001285 | -1.3663648 |
| C | 2.0872456  | 3.1001285  | -1.3663648 |
| C | -2.0872456 | 3.1001285  | 1.3663648  |
| C | 2.0872456  | -3.1001285 | 1.3663648  |
| C | -1.0731918 | -3.1352015 | -2.3485287 |
| C | 1.0731918  | 3.1352015  | -2.3485287 |
| C | -1.0731918 | 3.1352015  | 2.3485287  |
| C | 1.0731918  | -3.1352015 | 2.3485287  |
| C | -1.2844785 | -2.3066442 | -3.4887414 |
| C | 1.2844785  | 2.3066442  | -3.4887414 |
| C | -1.2844785 | 2.3066442  | 3.4887414  |
| C | 1.2844785  | -2.3066442 | 3.4887414  |
| C | -0.1771282 | -1.8264808 | -4.2769651 |
| C | 0.1771282  | 1.8264808  | -4.2769651 |
| C | -0.1771282 | 1.8264808  | 4.2769651  |
| C | 0.1771282  | -1.8264808 | 4.2769651  |
| C | 1.1178191  | -2.1457188 | -3.8785934 |
| C | -1.1178191 | 2.1457188  | -3.8785934 |
| C | 1.1178191  | 2.1457188  | 3.8785934  |
| C | -1.1178191 | -2.1457188 | 3.8785934  |
| C | 0.5436782  | -3.7467469 | -0.4913289 |
| C | -0.5436782 | 3.7467469  | -0.4913289 |
| C | 0.5436782  | 3.7467469  | 0.4913289  |
| C | -0.5436782 | -3.7467469 | 0.4913289  |
| C | 0.2795995  | -3.4812937 | -1.9202927 |
| C | -0.2795995 | 3.4812937  | -1.9202927 |
| C | 0.2795995  | 3.4812937  | 1.9202927  |
| C | -0.2795995 | -3.4812937 | 1.9202927  |
| C | 1.3421602  | -3.0056857 | -2.7351636 |
| C | -1.3421602 | 3.0056857  | -2.7351636 |
| C | 1.3421602  | 3.0056857  | 2.7351636  |
| C | -1.3421602 | -3.0056857 | 2.7351636  |
| C | 1.8434508  | -3.4922058 | -0.0010656 |
| C | -1.8434508 | 3.4922058  | -0.0010656 |
| C | 1.8434508  | 3.4922058  | 0.0010656  |
| C | -1.8434508 | -3.4922058 | 0.0010656  |
| C | 2.8226397  | -2.8226397 | -0.8081058 |
| C | -2.8226397 | 2.8226397  | -0.8081058 |
| C | 2.8226397  | 2.8226397  | 0.8081058  |
| C | -2.8226397 | -2.8226397 | 0.8081058  |
| C | 2.5803027  | -2.5803027 | -2.1396869 |
| C | -2.5803027 | 2.5803027  | -2.1396869 |
| C | 2.5803027  | 2.5803027  | 2.1396869  |
| C | -2.5803027 | -2.5803027 | 2.1396869  |
| C | 1.8264808  | 0.1771282  | -4.2769651 |
| C | -1.8264808 | -0.1771282 | -4.2769651 |



|    |            |            |            |
|----|------------|------------|------------|
| C  | 1.8264808  | -0.1771282 | 4.2769651  |
| C  | -1.8264808 | 0.1771282  | 4.2769651  |
| C  | -0.4938636 | -0.4938636 | -4.7500045 |
| C  | 0.4938636  | 0.4938636  | -4.7500045 |
| C  | -0.4938636 | 0.4938636  | 4.7500045  |
| C  | 0.4938636  | -0.4938636 | 4.7500045  |
| C  | 2.1457188  | -1.1178191 | -3.8785934 |
| C  | -2.1457188 | 1.1178191  | -3.8785934 |
| C  | 2.1457188  | 1.1178191  | 3.8785934  |
| C  | -2.1457188 | -1.1178191 | 3.8785934  |
| C  | 3.1001285  | 2.0872456  | -1.3663648 |
| C  | -3.1001285 | -2.0872456 | -1.3663648 |
| C  | 3.1001285  | -2.0872456 | 1.3663648  |
| C  | -3.1001285 | 2.0872456  | 1.3663648  |
| C  | 2.3066442  | 1.2844785  | -3.4887414 |
| C  | -2.3066442 | -1.2844785 | -3.4887414 |
| C  | 2.3066442  | -1.2844785 | 3.4887414  |
| C  | -2.3066442 | 1.2844785  | 3.4887414  |
| C  | 3.1352015  | 1.0731918  | -2.3485287 |
| C  | -3.1352015 | -1.0731918 | -2.3485287 |
| C  | 3.1352015  | -1.0731918 | 2.3485287  |
| C  | -3.1352015 | 1.0731918  | 2.3485287  |
| C  | 3.4812937  | -0.2795995 | -1.9202927 |
| C  | -3.4812937 | 0.2795995  | -1.9202927 |
| C  | 3.4812937  | 0.2795995  | 1.9202927  |
| C  | -3.4812937 | -0.2795995 | 1.9202927  |
| C  | 3.7467469  | -0.5436782 | -0.4913289 |
| C  | -3.7467469 | 0.5436782  | -0.4913289 |
| C  | 3.7467469  | 0.5436782  | 0.4913289  |
| C  | -3.7467469 | -0.5436782 | 0.4913289  |
| C  | 3.0056857  | -1.3421602 | -2.7351636 |
| C  | -3.0056857 | 1.3421602  | -2.7351636 |
| C  | 3.0056857  | 1.3421602  | 2.7351636  |
| C  | -3.0056857 | -1.3421602 | 2.7351636  |
| C  | 3.4922058  | -1.8434508 | -0.0010656 |
| C  | -3.4922058 | 1.8434508  | -0.0010656 |
| C  | 3.4922058  | 1.8434508  | 0.0010656  |
| C  | -3.4922058 | -1.8434508 | 0.0010656  |
| He | -0.0000000 | 0.0000000  | 0.0000000  |

${}^3\text{He}@D_{2d}(4)\text{C}_{84}^{6-}$

85

|   |            |            |            |
|---|------------|------------|------------|
| C | -2.1116772 | -3.1511888 | -1.3522795 |
| C | 2.1116772  | 3.1511888  | -1.3522795 |
| C | -2.1116772 | 3.1511888  | 1.3522795  |
| C | 2.1116772  | -3.1511888 | 1.3522795  |
| C | -1.0847110 | -3.1597687 | -2.3378016 |
| C | 1.0847110  | 3.1597687  | -2.3378016 |
| C | -1.0847110 | 3.1597687  | 2.3378016  |
| C | 1.0847110  | -3.1597687 | 2.3378016  |
| C | -1.3030104 | -2.3336385 | -3.4916770 |

|   |            |            |            |
|---|------------|------------|------------|
| C | 1.3030104  | 2.3336385  | -3.4916770 |
| C | -1.3030104 | 2.3336385  | 3.4916770  |
| C | 1.3030104  | -2.3336385 | 3.4916770  |
| C | -0.1921003 | -1.8265209 | -4.2749180 |
| C | 0.1921003  | 1.8265209  | -4.2749180 |
| C | -0.1921003 | 1.8265209  | 4.2749180  |
| C | 0.1921003  | -1.8265209 | 4.2749180  |
| C | 1.1233691  | -2.1594427 | -3.8734741 |
| C | -1.1233691 | 2.1594427  | -3.8734741 |
| C | 1.1233691  | 2.1594427  | 3.8734741  |
| C | -1.1233691 | -2.1594427 | 3.8734741  |
| C | 0.5372953  | -3.7950439 | -0.4968395 |
| C | -0.5372953 | 3.7950439  | -0.4968395 |
| C | 0.5372953  | 3.7950439  | 0.4968395  |
| C | -0.5372953 | -3.7950439 | 0.4968395  |
| C | 0.2706443  | -3.5182809 | -1.9107832 |
| C | -0.2706443 | 3.5182809  | -1.9107832 |
| C | 0.2706443  | 3.5182809  | 1.9107832  |
| C | -0.2706443 | -3.5182809 | 1.9107832  |
| C | 1.3540914  | -3.0375061 | -2.7551666 |
| C | -1.3540914 | 3.0375061  | -2.7551666 |
| C | 1.3540914  | 3.0375061  | 2.7551666  |
| C | -1.3540914 | -3.0375061 | 2.7551666  |
| C | 1.8722582  | -3.5429989 | 0.0018479  |
| C | -1.8722582 | 3.5429989  | 0.0018479  |
| C | 1.8722582  | 3.5429989  | -0.0018479 |
| C | -1.8722582 | -3.5429989 | -0.0018479 |
| C | 2.8295445  | -2.8295445 | -0.8080961 |
| C | -2.8295445 | 2.8295445  | -0.8080961 |
| C | 2.8295445  | 2.8295445  | 0.8080961  |
| C | -2.8295445 | -2.8295445 | 0.8080961  |
| C | 2.5863013  | -2.5863013 | -2.1468199 |
| C | -2.5863013 | 2.5863013  | -2.1468199 |
| C | 2.5863013  | 2.5863013  | 2.1468199  |
| C | -2.5863013 | -2.5863013 | 2.1468199  |
| C | 1.8265209  | 0.1921003  | -4.2749180 |
| C | -1.8265209 | -0.1921003 | -4.2749180 |
| C | 1.8265209  | -0.1921003 | 4.2749180  |
| C | -1.8265209 | 0.1921003  | 4.2749180  |
| C | -0.5130759 | -0.5130759 | -4.7739590 |
| C | 0.5130759  | 0.5130759  | -4.7739590 |
| C | -0.5130759 | 0.5130759  | 4.7739590  |
| C | 0.5130759  | -0.5130759 | 4.7739590  |
| C | 2.1594427  | -1.1233691 | -3.8734741 |
| C | -2.1594427 | 1.1233691  | -3.8734741 |
| C | 2.1594427  | 1.1233691  | 3.8734741  |
| C | -2.1594427 | -1.1233691 | 3.8734741  |
| C | 3.1511888  | 2.1116772  | -1.3522795 |
| C | -3.1511888 | -2.1116772 | -1.3522795 |
| C | 3.1511888  | -2.1116772 | 1.3522795  |
| C | -3.1511888 | 2.1116772  | 1.3522795  |

|    |            |            |            |
|----|------------|------------|------------|
| C  | 2.3336385  | 1.3030104  | -3.4916770 |
| C  | -2.3336385 | -1.3030104 | -3.4916770 |
| C  | 2.3336385  | -1.3030104 | 3.4916770  |
| C  | -2.3336385 | 1.3030104  | 3.4916770  |
| C  | 3.1597687  | 1.0847110  | -2.3378016 |
| C  | -3.1597687 | -1.0847110 | -2.3378016 |
| C  | 3.1597687  | -1.0847110 | 2.3378016  |
| C  | -3.1597687 | 1.0847110  | 2.3378016  |
| C  | 3.5182809  | -0.2706443 | -1.9107832 |
| C  | -3.5182809 | 0.2706443  | -1.9107832 |
| C  | 3.5182809  | 0.2706443  | 1.9107832  |
| C  | -3.5182809 | -0.2706443 | 1.9107832  |
| C  | 3.7950439  | -0.5372953 | -0.4968395 |
| C  | -3.7950439 | 0.5372953  | -0.4968395 |
| C  | 3.7950439  | 0.5372953  | 0.4968395  |
| C  | -3.7950439 | -0.5372953 | 0.4968395  |
| C  | 3.0375061  | -1.3540914 | -2.7551666 |
| C  | -3.0375061 | 1.3540914  | -2.7551666 |
| C  | 3.0375061  | 1.3540914  | 2.7551666  |
| C  | -3.0375061 | -1.3540914 | 2.7551666  |
| C  | 3.5429989  | -1.8722582 | 0.0018479  |
| C  | -3.5429989 | 1.8722582  | 0.0018479  |
| C  | 3.5429989  | 1.8722582  | -0.0018479 |
| C  | -3.5429989 | -1.8722582 | -0.0018479 |
| He | 0.0000000  | 0.0000000  | 0.0000000  |
